# Supplementary material for: Triple blockade of EGFR, MEK and PD-L1 has antitumor activity in colorectal cancer models with constitutive activation of MAPK signaling and PD-L1 overexpression
Source: Springer Nature journal article supplement (doi:10.1186/s13046-019-1497-0), 2019-12-01

Supplementary Figure 1

**A**

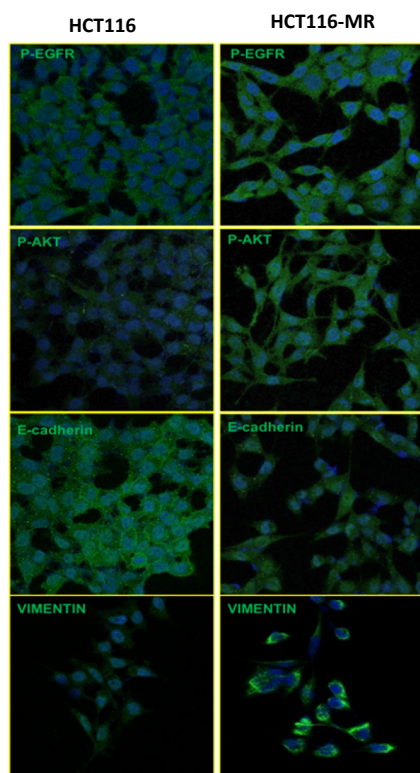

**B**

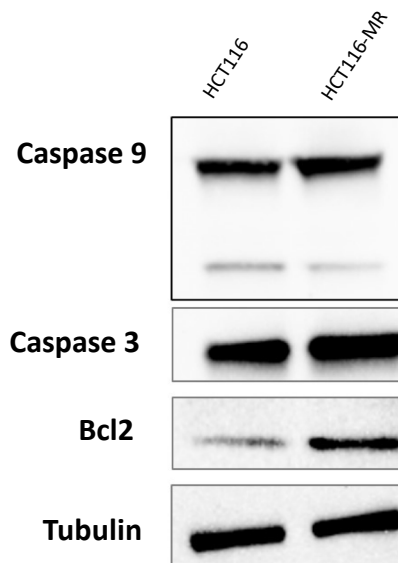

**C**

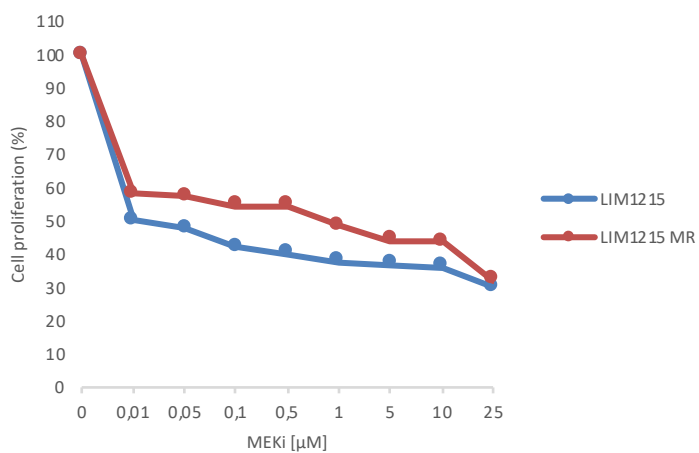

|            | IC <sub>50</sub> MEKi [μM] |
|------------|----------------------------|
| LIM1215    | 0.01                       |
| LIM1215-MR | 1                          |

**D**

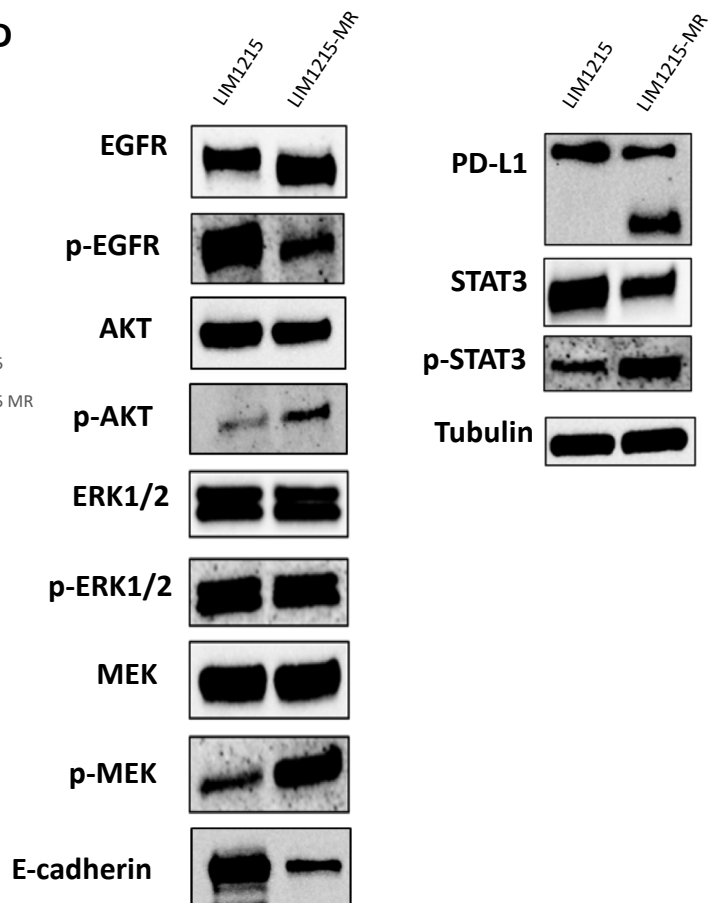

Supplement: MOESM1 [file 17680582]
