# Supplementary material for: Triple blockade of EGFR, MEK and PD-L1 has antitumor activity in colorectal cancer models with constitutive activation of MAPK signaling and PD-L1 overexpression
Source: Springer Nature journal article supplement (doi:10.1186/s13046-019-1497-0), 2019-12-01
Supplement: MOESM2 [file 17680582]

Supplementary Figure 2

**A** ● CTR ▲ MEKi

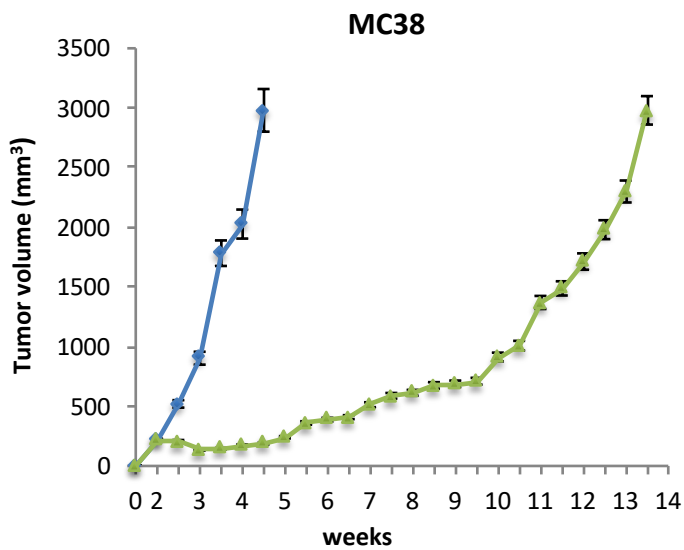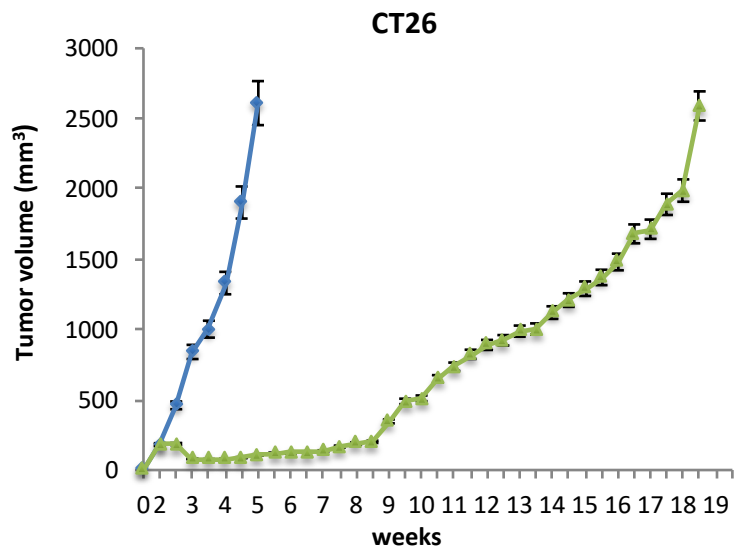

**B**

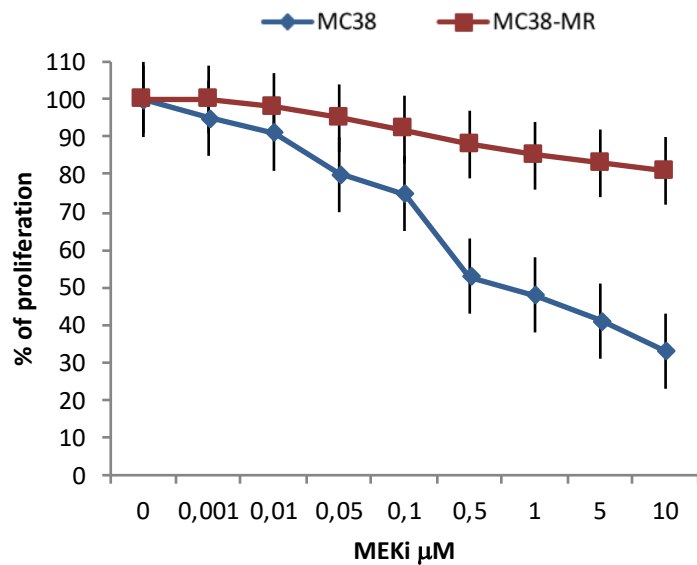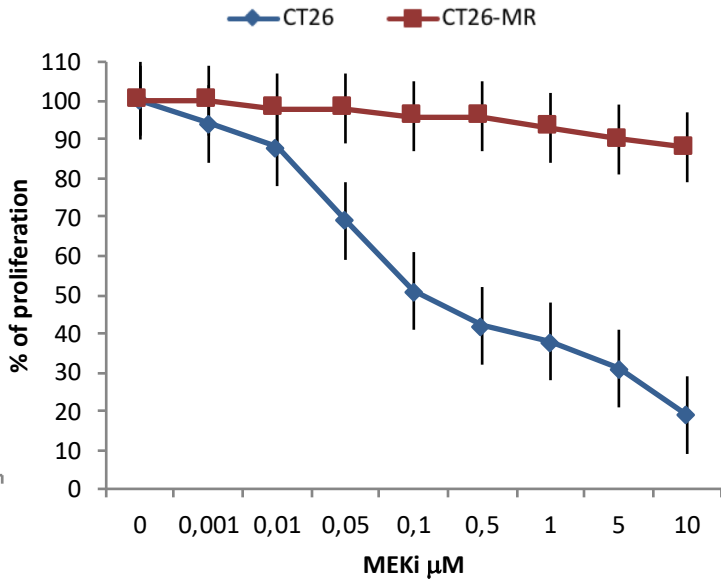

|         | IC <sub>50</sub> MEKi [ $\mu\text{M}$ ] |
|---------|-----------------------------------------|
| MC38    | 0.5                                     |
| MC38-MR | >10                                     |
| CT26    | 0.1                                     |
| CT26-MR | >10                                     |
